# Supplementary material
Source: Research Square preprint supplement (doi:10.21203/rs.3.rs-8659114/v1)
Supplement: Supplementary file 1 [file 88cb3635134811b6992319aa.docx]

**Supplementary Table 1.** Included DPC codes and their corresponding ICD-10 codes

| Category | ICD-10 Code | DPC |
| --- | --- | --- |
| Gonorrhea | A540  A541  A542  A543  A544  A545  A546  A548  A549 | 8841083  8841073  982003  982001  981006  981002  980016  980008  980006  980002  8841087  8841082  8841080  981008  981004  981003  8835059  984005  8841076  8841074  8841072  985003  8841071  987002  987001  8843634  8841088  8841086  8841085  8841081  8841079  8841077  980013 |
| Chlamydia | A55  A560  A561  A563  A564  O983 | 8837964  8836804  8832824  991007  8832827  8832819  8832818  6160019  788002  8848331  8845552  8832823  8832822  8832821  8832820  8832825  8832817  8848498 |
| Syphilis | A500  A501  A502  A503  A504  A505  A506  A507  A509  A510  A511  A512  A513  A514  A515  A519  A520  A521  A522  A523  A527  A528  A529  A530  A539  G98  O981 | 8836647  8836645  8836642  8836640  8836639  8836638  900003  8836409  902001  8839127  8839062  8839061  8839131  8836397  8836394  8836393  8835255  8835253  8839060  8838969  905002  8836411  907001  909005  8837213  7828005  910003  910002  8837212  8838446  8833470  8833177  8831969  8844202  8840017  8839090  8839089  8839086  8839082  8839078  914003  913006  913002  8837232  8837231  8837230  8837229  8837228  8837227  8837226  8836649  8833973  3626004  8836410  8836648  8839088  8839087  8839084  8839081  8839080  8839079  8839073  8839071  8834964  4209014  8841310  8839144  8839143  8839142  8839139  8839138  8839135  8839134  8839091  8839083  8839075  8839070  8839066  8836005  8836004  8834978  8834965  8834961  8833241  8832937  949003  949002  8840484  949001  8840535  8839136  8839092  8839077  8839069  8839068  8839067  8839065  8839064  8839063  8839059  8838881  8835639  8833826  8833627  8832743  8832045  8831988  8831669  8831394  950003  948012  948005  905003  8833382  8839132  8839058  8836412  8839057  8836080  979001  8847489  8838415  8834944  3499032  3499004  940001  6470002 |
| Condyloma | A630  O983 | 8846538  8837531  8836084  8833705  8830631  8830624  8848579 |

DPC, Diagnosis and Procedure Code; ICD-10, International Classification of Diseases and Related Health Problems, 10th edition

| **Supplementary Table 2.** Age and gender distribution of MDV and MHLW data sets. | | | | | | | | | | | | | | | | | | | | | |  |  | |  |  |  | |  |  |  |  |  |  |
| --- | --- | --- | --- | --- | --- | --- | --- | --- | --- | --- | --- | --- | --- | --- | --- | --- | --- | --- | --- | --- | --- | --- | --- | --- | --- | --- | --- | --- | --- | --- | --- | --- | --- | --- |
| **MDV Data** |  |  | |  | |  |  |  |  | |  | |  | |  |  | |  | |  |  | | |  | | | |
| **Syphilis** | **0-9** | | **10-19** | | | **20-29** | | **30-39** | | **40-49** | | | | **50-59** | | | | | **60 and over** | | | | | **Total** | | | |
| Male | 0 | 0.0% | 29 | | 0.7% | 443 | 10.3% | 655 | 15.3% | 677 | | 15.8% | | 454 | | | 10.6% | | 595 | | 13.9% | | | 2,853 | | | |
| Female | 0 | 0.0% | 95 | | 2.2% | 528 | 12.3% | 271 | 6.3% | 162 | | 3.8% | | 90 | | | 2.1% | | 296 | | 6.9% | | | 1,442 | | | |
| **Chlamydia** |  |  |  | |  |  |  |  |  |  | |  | |  | | |  | |  | |  | | |  | | | |
| Male | 0 | 0.0% | 251 | | 1.4% | 1,813 | 10.2% | 1,299 | 7.3% | 768 | | 4.3% | | 289 | | | 1.6% | | 167 | | 0.9% | | | 4,587 | | | |
| Female | 0 | 0.0% | 1,541 | | 8.7% | 6,529 | 36.7% | 3,536 | 19.9% | 1,280 | | 7.2% | | 241 | | | 1.4% | | 80 | | 0.4% | | | 13,207 | | | |
| **Condyloma** |  |  |  | |  |  |  |  |  |  | |  | |  | | |  | |  | |  | | |  | | | |
| Male | 48 | 0.8% | 87 | | 1.4% | 770 | 12.1% | 722 | 11.3% | 623 | | 9.8% | | 425 | | | 6.7% | | 678 | | 10.6% | | | 3,353 | | | |
| Female | 43 | 0.7% | 433 | | 6.8% | 155 | 2.4% | 1,096 | 17.2% | 628 | | 9.8% | | 265 | | | 4.1% | | 415 | | 6.5% | | | 3,035 | | | |
| **Gonorrhea** |  |  |  | |  |  |  |  |  |  | |  | |  | | |  | |  | |  | | |  | | | |
| Male | 1 | 0.0% | 185 | | 4.6% | 1,069 | 26.6% | 752 | 18.7% | 437 | | 10.9% | | 189 | | | 4.7% | | 86 | | 2.1% | | | 2,719 | | | |
| Female | 22 | 0.5% | 216 | | 5.4% | 589 | 14.7% | 273 | 6.8% | 129 | | 3.2% | | 54 | | | 1.3% | | 16 | | 0.4% | | | 1,299 | | | |
| **Total** | 114 |  | 2,837 | |  | 11,896 |  | 8,604 |  | 4,704 | |  | | 2,007 | | |  | | 2,333 | |  | | | 32,495 | | | |
|  |  |  |  | |  |  |  |  |  |  | |  | |  | | |  | |  | |  | | |  | | | |
| **MHLW Data** | |  |  | |  |  |  |  |  |  | |  | |  | | |  | |  | |  | | |  | | | |
| **Syphilis** | **0-9** | | **10-19** | | | **20-29** | | **30-39** | | **40-49** | | | | **50-59** | | | | | **60 and over** | | | | | **Total** | | | |
| Male | 80 | 0% | 508 | | 1% | 7,472 | 16% | 8,625 | 18% | 8,214 | | 17% | | 4,413 | | | 9% | | 3,133 | | 7% | | | 32,445 | | | |
| Female | 82 | 0% | 1,174 | | 2% | 7,551 | 16% | 2,757 | 6% | 1,554 | | 3% | | 653 | | | 1% | | 1,099 | | 2% | | | 14,870 | | | |
| **Chlamydia** |  |  |  | |  |  |  |  |  |  | |  | |  | | |  | |  | |  | | |  | | | |
| Male | 15 | 0.0% | 8,880 | | 2.4% | 72,578 | 19.8% | 52,479 | 14.3% | 28,140 | | 7.7% | | 10,384 | | | 2.8% | | 3,638 | | 1.0% | | | 176,114 | | | |
| Female | 23 | 0.0% | | 27,717 | | 7.6% | 108,994 | 29.8% | 39,841 | | 10.9% | | 10,951 | | 3.0% | 2,215 | | 0.6% | | 425 | 0.1% | | | 190,166 | | | |
| **Condyloma** |  |  | |  | |  |  |  |  | |  | |  | |  |  | |  | |  |  | | |  | | | |
| Male | 44 | 0.1% | | 926 | | 1.2% | 13,795 | 17.5% | 14,554 | | 18.5% | | 10,293 | | 13.1% | 4,965 | | 6.3% | | 3,028 | 3.8% | | | 47,605 | | | |
| Female | 28 | 0.0% | | 2,712 | | 3.4% | 16,098 | 20.5% | 7,439 | | 9.5% | | 3,254 | | 4.1% | 970 | | 1.2% | | 587 | 0.7% | | | 31,088 | | | |
| **Gonorrhea** |  |  | |  | |  |  |  |  | |  | |  | |  |  | |  | |  |  | | |  | | | |
| Male | 5 | 0.0% | | 5,543 | | 4.3% | 40,816 | 31.7% | 30,472 | | 23.6% | | 17,263 | | 13.4% | 6,157 | | 4.8% | | 2,120 | 1.6% | | | 102,376 | | | |
| Female | 61 | 0.0% | | 4,218 | | 3.3% | 13,832 | 10.7% | 5,069 | | 3.9% | | 2,258 | | 1.8% | 861 | | 0.7% | | 249 | 0.2% | | | 26,548 | | | |
| **Total** | 338 |  | | 51,678 | |  | 281,136 |  | 161,236 | |  | | 81,927 | |  | 30,618 | |  | | 14,279 |  | | | 621,212 | | | |
